# Supplementary material for: Insulin-activated store-operated Ca2+ entry via Orai1 induces podocyte actin remodeling and causes proteinuria
Source: PubMed Central journal article supplement (PMC8586150; doi:10.1038/s41467-021-26900-w), 2021-11-11
Supplement: 41467_2021_26900_MOESM1_ESM.pdf [file 41467_2021_26900_MOESM1_ESM.pdf]

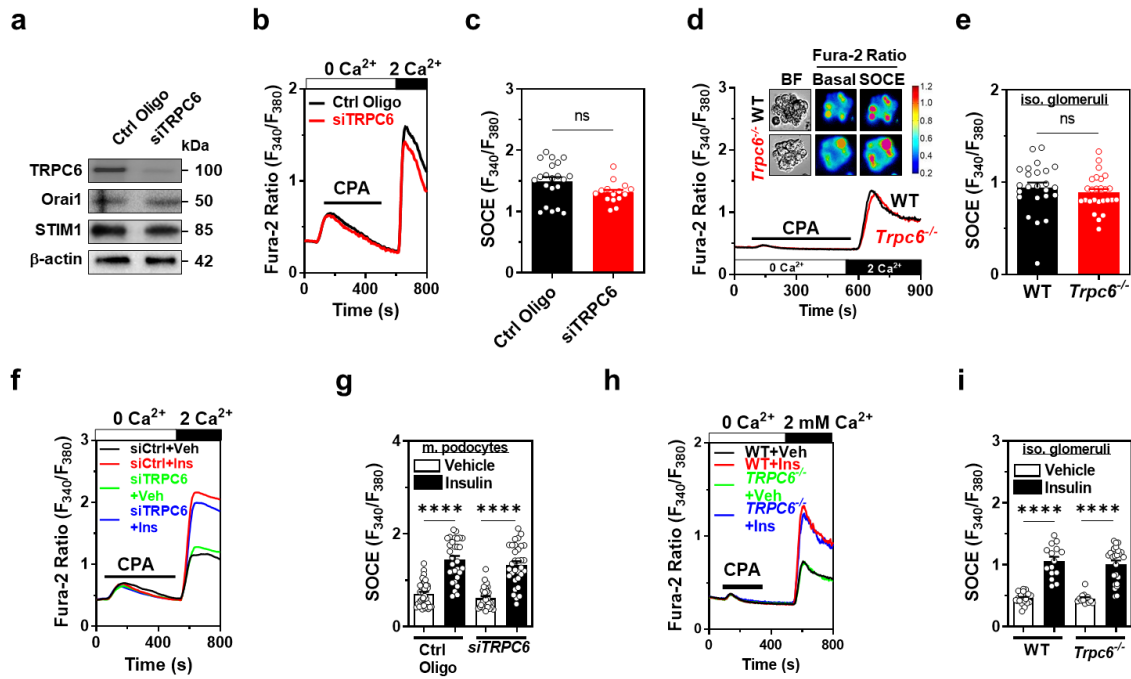

### Supplementary Fig. 1 TRPC6 may not participate in store-operated $\text{Ca}^{2+}$ entry (SOCE) in podocyte.

**a** Effect of TRPC6 siRNA knockdown on the expression of Orai1 and STIM1 in mouse podocytes. Repeated 3 independent experiments. **b** Representative traces of fura-2 ratio representing the effect of TRPC6 silencing on SOCE in podocytes. **c** Summary of the SOCE in panel (b).  $n = 21$  and 15 cells, respectively. **d** Representative fluorescence images (upper panel) and traces of fura-2 ratio (lower panel) in acutely isolated mouse glomeruli from wild type (WT) and *Trpc6*<sup>-/-</sup> mice. **e** Summary of the SOCE in panel (d).  $n = 24$  (WT), and 26 (*Trpc6*<sup>-/-</sup>) glomeruli. **f** Representative SOCE traces showing the effect of TRPC6 knockdown on insulin-stimulated SOCE in cultured mouse podocytes. **g** Summary of the SOCE in panel (f).  $n = 37, 30, 28, 32$  cells per each group. **h** Representative SOCE traces showing insulin (100 nM, 1 h)-activated SOCE in acutely isolated mouse glomeruli from WT and *Trpc6*<sup>-/-</sup> mice. **i** Summary of the SOCE in panel (h).  $n = 21, 15, 14,$  and 24 glomeruli each. Data are expressed as mean  $\pm$  SEM analyzed with unpaired two-tailed Student's *t*-test to Ctrl Oligo and WT (**c** and **e**) and two-way ANOVA followed by Tukey's multiple comparisons test (**g** and **i**). \*\*\*\* $p < 0.0001$ , ns., not significant.

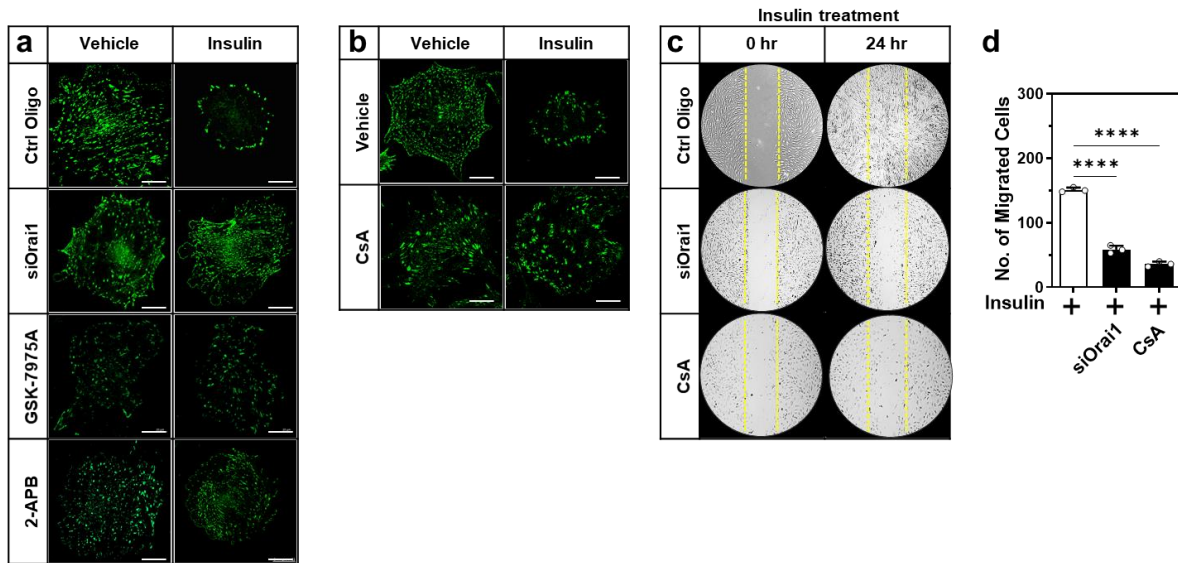

**Supplementary Fig. 2 Insulin stimulation of Orai1 promotes disruption of focal adhesion and cell migration.**

**a** Effect of Orai1 inhibition by siRNA knockdown or its blockers, GSK-7975A (3  $\mu$ M) or 2-APB (100  $\mu$ M), on insulin-induced redistribution of paxillin in cultured mouse podocytes. **b** Effect of cyclosporine A (CsA; 10  $\mu$ M) on insulin-mediated redistribution of paxillin in cultured mouse podocytes. Scale bar = 50  $\mu$ m., All images were represented similarly from 3 independent experiments and randomly chosen 10~12 cells in each dish (**a** and **b**). **c** Scratch assay showing the effect of siRNA Orai1 (siOrai1) and CsA on insulin-stimulated podocyte motility. **d** Cell motility was evaluated by counting the number of migrated cells into the wound area after 24 h.  $n = 3$  independent experiments. Data are expressed as mean  $\pm$  SEM and analyzed with one-way ANOVA followed by Dunnett's multiple comparisons test (**d**). \*\*\*\* $p < 0.0001$ .

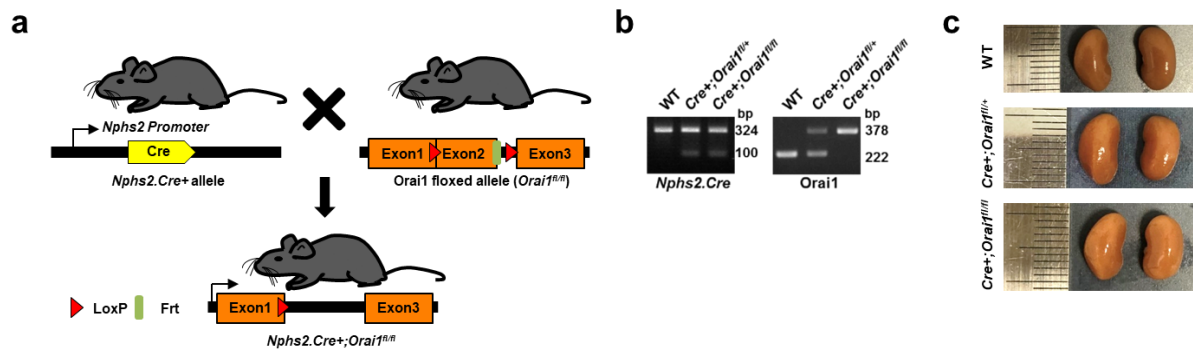

**Supplementary Fig. 3 Construction and macroscopic kidneys of podocyte-specific *Orai1*-deletion mice.**

**a** Schematic representation of the *Nphs2.Cre+* (upper left) and *Orai1<sup>fl/fl</sup>* (upper right) mice to generate podocyte-specific *Orai1* knockout. Exon 2 of the *Orai1* gene was targeted<sup>46</sup> in the *Nphs2.Cre+;Orai1<sup>fl/fl</sup>* mice (lower). **b** Germ-line transmission of Cre and flox alleles was validated by genotyping PCR. The 324-base pair (bp) band is the international positive control and the 100 bp band denotes *Nphs2.Cre+* (left). The 378-base pair (bp) band is derived from the floxed allele while the 222-bp band denotes the wild-type (WT) allele (right). **c** No difference in kidney size was observed between podocyte-specific *Orai1* knockout and WT mice at 10 weeks. Scale bar = 1 mm.

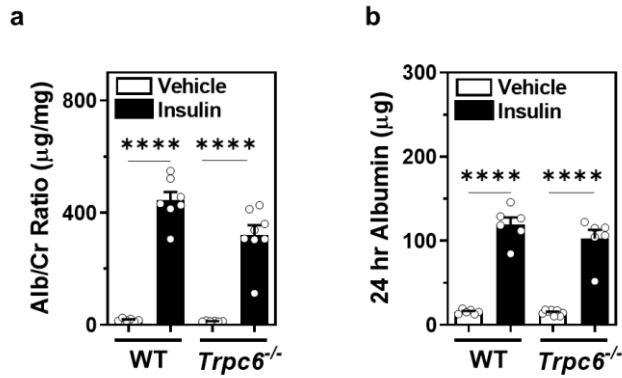

**Supplementary Fig. 4 TRPC6 may not participate in insulin-stimulated proteinuria.**

**a-b** Quantitative analysis of 24 h urinary albumin/creatinine (Alb/Cr) ratio (left) (**a**) and albumin excretion (right) (**b**) after administration of insulin (*i.p.*; 5 U/kg) in wild type (WT) and *Trpc6*<sup>-/-</sup> mice (9-11 weeks old, *n* = 6, 7, 6, 8 mice each). Data are represented as mean ± SEM and were analyzed using analyzed with two-way ANOVA followed by Tukey's multiple comparisons test (**a** and **b**). \*\*\*\**p* < 0.0001.

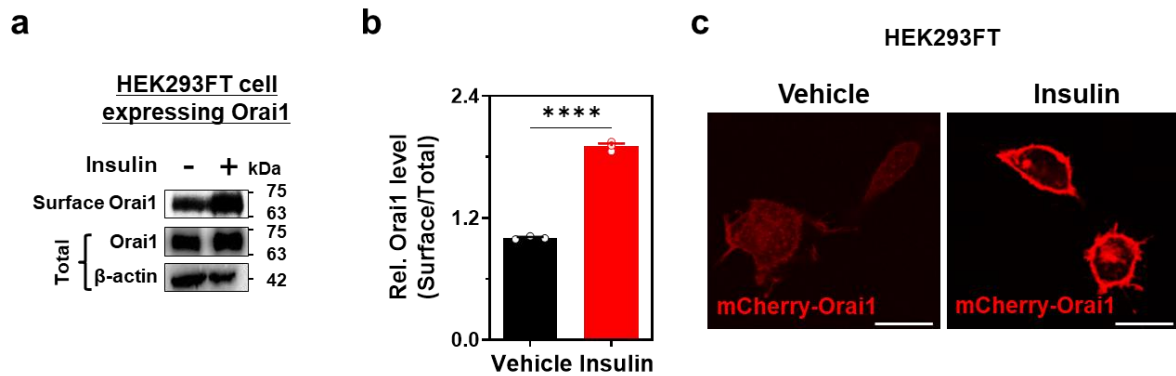

**Supplementary Fig. 5 Insulin increases cell surface abundance of Orai1 in HEK293FT cells**

**a** Biotinylation assay showing the insulin effect (100 nM, 1 h) on the cell-surface abundance of Orai1 in HEK293FT cells transiently expressing mCherry-Flag-tagged Orai1 and YFP-tagged STIM1. **b** Quantification of surface Orai1 by densitometry in three independent experiments of panel (a).  $n=3$  independent experiments. Data are represented as mean  $\pm$  SEM and were analyzed using unpaired two-tailed Student's *t*-test. \*\*\*\* $p < 0.0001$ . **c** Confocal images showing the effect of insulin treatment on Orai1 localization in HEK293FT cells expressing mCherry-Flag-tagged Orai1. Scale bar = 25  $\mu$ m.

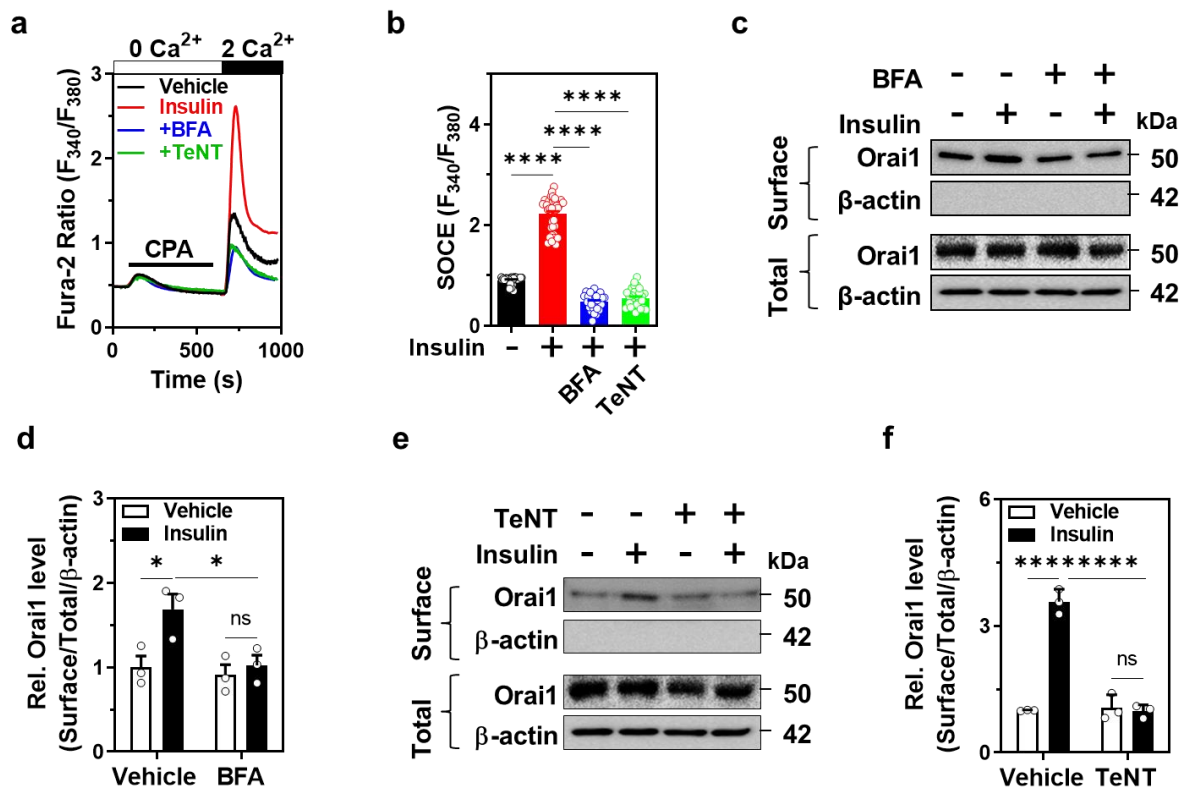

**Supplementary Fig. 6 Insulin increases cell surface abundance of Orai1 by stimulating its exocytosis.**

**a** Representative trace of insulin-stimulated store-operated  $\text{Ca}^{2+}$  entry (SOCE) in addition to brefeldin A (BFA, 10  $\mu\text{M}$ , 8 hr) or tetanus toxin (TeNT, 60 nM, 8 hr). **b** Summary of the SOCE in panel (a).  $n = 26, 35, 29, 29$  cells per each group. **c-f** Biotinylation assay showing the effects of BFA (**c-d**) and TeNT (**e-f**) treatment on cell surface abundance of Orai1 after insulin stimulation. All the experiments were repeated 3 times independently. Data are represented as mean  $\pm$  SEM and were analyzed using one-way ANOVA followed by Tukey's multiple comparisons test (**b**, **d**, and **f**). \* $p < 0.05$ , \*\*\*\* $p < 0.0001$ ; ns, not significant.

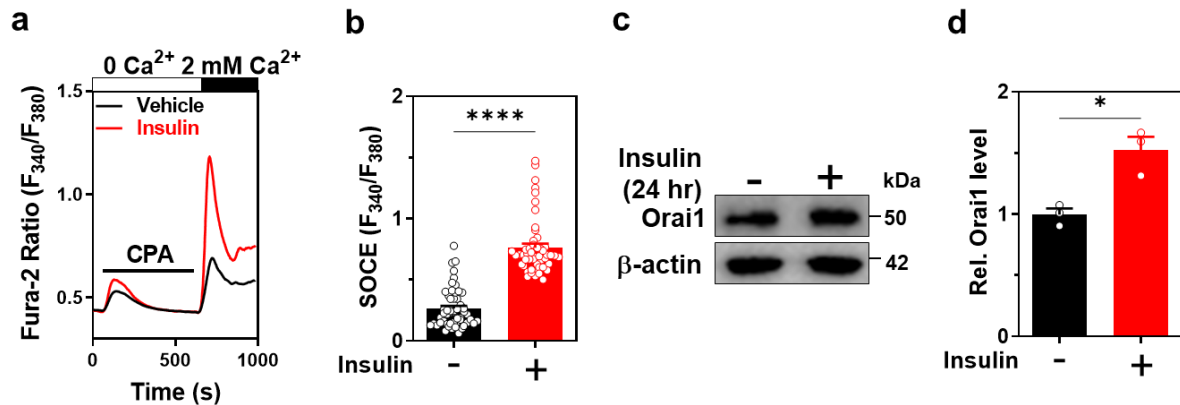

**Supplementary Fig. 7 Effect of long-term incubation of insulin on store-operated  $\text{Ca}^{2+}$  entry (SOCE) and Orai1 protein expression in podocytes.**

**a** Representative SOCE traces showing the effect of long-term insulin treatment (for 24 h) in cultured mouse podocytes. **b** Summary of the SOCE in panel (a).  $n = 53$  (Vehicle) and 50 (Insulin) cells. **c** Immunoblotting showing the effect of long-term insulin treatment (for 24 h) on Orai1 expression in podocytes. **d** Summary of the relative (Rel.) Orai1 level in panel (c).  $n = 3$  independent experiments. Data are represented as mean  $\pm$  SEM and were analyzed using unpaired two-tailed Student's  $t$ -test in (b and d). \* $p < 0.01$ , \*\*\*\* $p < 0.0001$ .

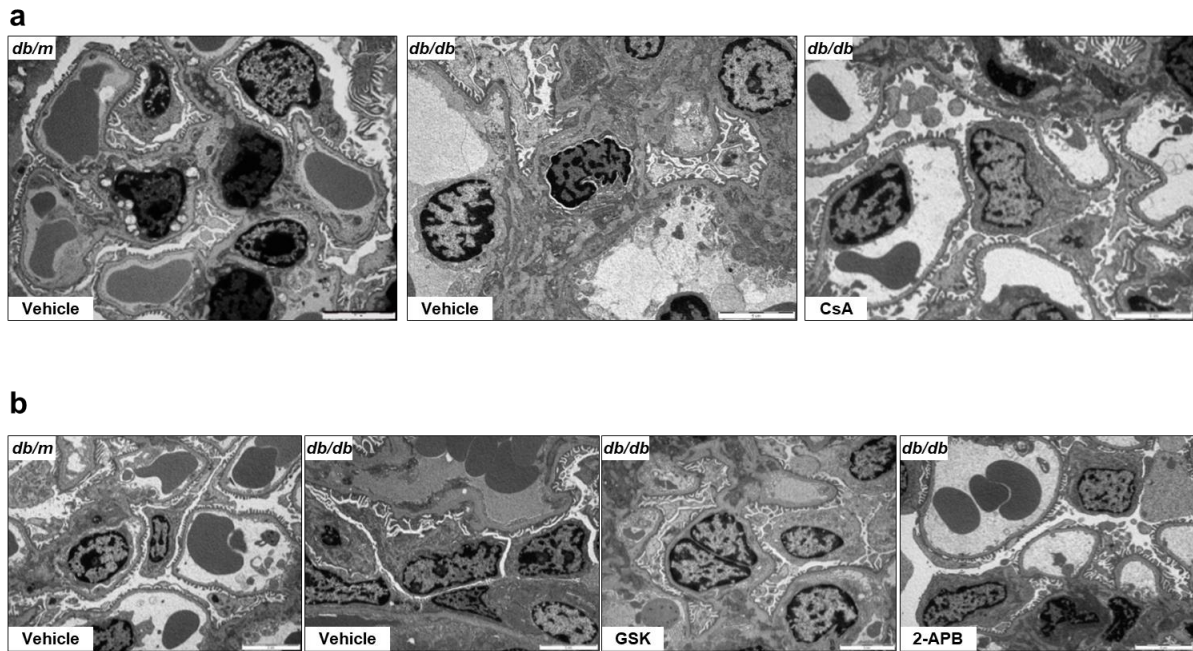

**Supplementary Fig. 8 Representative TAM images in CSA, GSK-7975A, and 2-APB *i.p.* injected *db/db* mice**

**a-b** Representative TEM images of kidney tissue in *db/m* and *db/db* mice with administration of CsA (**a**) or GSK or 2-APB (**b**). All images showed similar to the representative images of each group ( $n = 3$  for *db/m*+Vehicle, *db/db*+Vehicle, *db/db*+CsA, *db/db*+GSK, *db/db*+2-APB) and were taken 5 different locations randomly in one mouse. Magnification is 5,000X. Scale bar = 5  $\mu\text{m}$ .



**Supplementary Table 1. List of mouse primer sequences used for PCR.**

| <b>Gene<br/>(Accession no.)</b>   | <b>Purpose</b>             | <b>Primer sequence (5' to 3')</b> |                                   | <b>Size(bp)</b>                                                                     |
|-----------------------------------|----------------------------|-----------------------------------|-----------------------------------|-------------------------------------------------------------------------------------|
| Mouse 18s<br>(NR_003278.1)        | Quantitative real-time PCR | Forward                           | CGG CGT TAT TCC CAT GAC           | 108                                                                                 |
|                                   |                            | Reverse                           | GCC CTT CCG TCA ATT CCT           |                                                                                     |
| Mouse Orai1<br>(NM_175423.3)      | Quantitative real-time PCR | Forward                           | ATG GTA GCG ATG GTG GAA GT        | 122                                                                                 |
|                                   |                            | Reverse                           | CTG ATC ATG AGG GCA AAC AG        |                                                                                     |
| Mouse Orai2<br>(NM_178751.3)      | Quantitative real-time PCR | Forward                           | CTG CAT GAG ATC CAC CAC AC        | 97                                                                                  |
|                                   |                            | Reverse                           | GGG GAC AGG AGT ATG GGA TT        |                                                                                     |
| Mouse Orai3<br>(NM_198424.3)      | Quantitative real-time PCR | Forward                           | AAC CTC ACA CCA TCC TCT GC        | 96                                                                                  |
|                                   |                            | Reverse                           | GCC TGG TCC ATG AGC ACT AT        |                                                                                     |
| <i>Nphs2_Cre</i>                  | Genotype                   | Forward                           | GCG GTC TGG CAG TAA AAA CTA TC    | 100                                                                                 |
|                                   |                            | Reverse                           | GTG AAA CAG CAT TGC TGT CAC TT    |                                                                                     |
| <i>Orai1_flox</i>                 | Genotype                   | Forward                           | AGG CGG CCT ATA ATT CCA GCT TCA   | WT;222<br><i>Orai1<sup>fl/-</sup></i> ;222,378<br><i>Orai1<sup>fl/fl</sup></i> ;378 |
|                                   |                            | Reverse                           | AGG TGG ATG TTG CTG AGA GAC CAA   |                                                                                     |
| International<br>Positive control | Genotype                   | Forward                           | CTA GGC CAC AGA ATT GAA AGA TCT   | 324                                                                                 |
|                                   |                            | Reverse                           | GTA GGT GGA AAT TCT AGC ATC ATC C |                                                                                     |
